# Supplementary material for: Transcriptome profiling reveals histone deacetylase 1 gene overexpression improves flavonoid, isoflavonoid, and phenylpropanoid metabolism in Arachis hypogaea hairy roots
Source: PeerJ journal article supplement (doi:10.7717/peerj.10976), 2021-03-16
Supplement: Figure_supplementary-1.pdf [file Figure_supplementary-1.pdf]

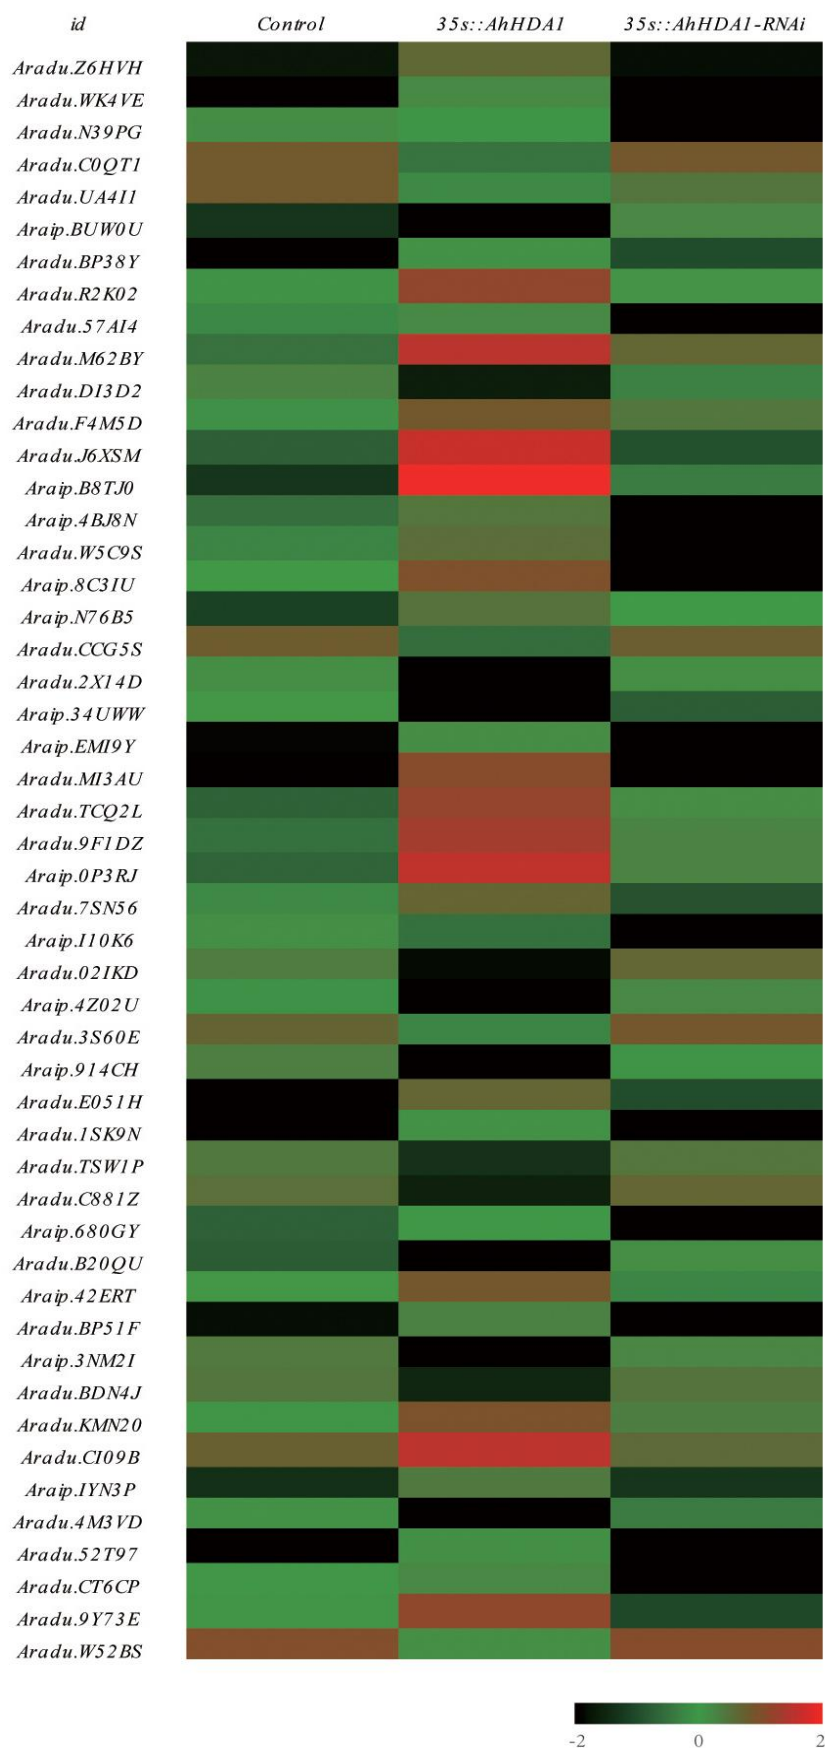

Figure S1 Heatmap of substance synthesis and energy metabolism pathway among different hairy roots.
