# Supplementary material for: Transcriptome profiling reveals histone deacetylase 1 gene overexpression improves flavonoid, isoflavonoid, and phenylpropanoid metabolism in Arachis hypogaea hairy roots
Source: PeerJ. 2021 Mar 16;9:e10976. doi: 10.7717/peerj.10976 (PMC7977374; doi:10.7717/peerj.10976)
Supplement: Supplemental Information 3 [file peerj-09-10976-s003.xls]

## Sheet: Araip.B8TJ0
MARTBOX 1 (+) TTWTWTTWTT S000067
MARTBOX 2 (+) TTWTWTTWTT S000067
MARTBOX 3 (+) TTWTWTTWTT S000067
MARTBOX 4 (+) TTWTWTTWTT S000067
MARTBOX 5 (+) TTWTWTTWTT S000067
MARTBOX 6 (+) TTWTWTTWTT S000067
GT1CORE 17 (+) GGTTAA S000125
CAATBOX1 30 (+) CAAT S000028
CACTFTPPCA1 36 (+) YACT S000449
WBOXHVISO1 48 (+) TGACT S000442
WRKY71OS 48 (+) TGAC S000447
WBOXNTERF3 48 (+) TGACY S000457
NTBBF1ARROLB 50 (+) ACTTTA S000273
GATABOX 59 (+) GATA S000039
CAATBOX1 68 (+) CAAT S000028
DOFCOREZM 89 (+) AAAG S000265
ARR1AT 92 (+) NGATT S000454
TATABOX3 96 (+) TATTAAT S000110
WRKY71OS 115 (+) TGAC S000447
WBOXNTERF3 115 (+) TGACY S000457
DOFCOREZM 120 (+) AAAG S000265
ROOTMOTIFTAPOX1 125 (+) ATATT S000098
ARR1AT 130 (+) NGATT S000454
CIACADIANLELHC 135 (+) CAANNNNATC S000252
INRNTPSADB 152 (+) YTCANTYY S000395
-300ELEMENT 167 (+) TGHAAARK S000122
GT1CONSENSUS 168 (+) GRWAAW S000198
GT1GMSCAM4 168 (+) GAAAAA S000453
DOFCOREZM 171 (+) AAAG S000265
GT1CORE 174 (+) GGTTAA S000125
-300ELEMENT 211 (+) TGHAAARK S000122
TAAAGSTKST1 229 (+) TAAAG S000387
DOFCOREZM 230 (+) AAAG S000265
NODCON1GM 230 (+) AAAGAT S000461
OSE1ROOTNODULE 230 (+) AAAGAT S000467
POLLEN1LELAT52 249 (+) AGAAA S000245
MARTBOX 254 (+) TTWTWTTWTT S000067
TATABOX5 254 (+) TTATTT S000203
TATABOX5 259 (+) TTATTT S000203
MYBST1 270 (+) GGATA S000180
GATABOX 271 (+) GATA S000039
GT1CONSENSUS 271 (+) GRWAAW S000198
IBOXCORE 271 (+) GATAA S000199
ERELEE4 288 (+) AWTTCAAA S000037
POLASIG2 294 (+) AATTAAA S000081
ROOTMOTIFTAPOX1 311 (+) ATATT S000098
TATABOX3 312 (+) TATTAAT S000110
WBOXHVISO1 325 (+) TGACT S000442
WRKY71OS 325 (+) TGAC S000447
WBOXNTERF3 325 (+) TGACY S000457
CAATBOX1 350 (+) CAAT S000028
POLASIG1 351 (+) AATAAA S000080
BIHD1OS 360 (+) TGTCA S000498
CAATBOX1 371 (+) CAAT S000028
POLASIG1 372 (+) AATAAA S000080
CARGCW8GAT 381 (+) CWWWWWWWWG S000431
TATABOX5 382 (+) TTATTT S000203
TATABOXOSPAL 383 (+) TATTTAA S000400
POLLEN1LELAT52 391 (+) AGAAA S000245
MYB1AT 393 (+) WAACCA S000408
CURECORECR 417 (+) GTAC S000493
POLASIG2 437 (+) AATTAAA S000081
DOFCOREZM 442 (+) AAAG S000265
AMYBOX1 459 (+) TAACARA S000020
MYBGAHV 459 (+) TAACAAA S000181
GAREAT 459 (+) TAACAAR S000439
XYLAT 461 (+) ACAAAGAA S000510
DOFCOREZM 463 (+) AAAG S000265
POLLEN1LELAT52 465 (+) AGAAA S000245
GT1CONSENSUS 466 (+) GRWAAW S000198
GT1GMSCAM4 466 (+) GAAAAA S000453
ACGTATERD1 474 (+) ACGT S000415
GTGANTG10 490 (+) GTGA S000378
GATABOX 492 (+) GATA S000039
IBOXCORE 492 (+) GATAA S000199
CACTFTPPCA1 527 (+) YACT S000449
EBOXBNNAPA 534 (+) CANNTG S000144
MYCCONSENSUSAT 534 (+) CANNTG S000407
CACTFTPPCA1 534 (+) YACT S000449
CAATBOX1 542 (+) CAAT S000028
S1FBOXSORPS1L21 544 (+) ATGGTA S000223
CURECORECR 547 (+) GTAC S000493
ACGTABOX 548 (+) TACGTA S000130
ACGTATERD1 549 (+) ACGT S000415
REALPHALGLHCB21 556 (+) AACCAA S000362
POLLEN1LELAT52 577 (+) AGAAA S000245
DOFCOREZM 579 (+) AAAG S000265
SP8BFIBSP8BIB 584 (+) TACTATT S000184
CACTFTPPCA1 584 (+) YACT S000449
CAATBOX1 591 (+) CAAT S000028
CACTFTPPCA1 594 (+) YACT S000449
GTGANTG10 598 (+) GTGA S000378
WBOXHVISO1 599 (+) TGACT S000442
WRKY71OS 599 (+) TGAC S000447
WBOXNTERF3 599 (+) TGACY S000457
GATABOX 606 (+) GATA S000039
ROOTMOTIFTAPOX1 618 (+) ATATT S000098
EECCRCAH1 627 (+) GANTTNC S000494
-300ELEMENT 663 (+) TGHAAARK S000122
POLASIG1 668 (+) AATAAA S000080
TAAAGSTKST1 670 (+) TAAAG S000387
DOFCOREZM 671 (+) AAAG S000265
TATABOX5 678 (+) TTATTT S000203
ROOTMOTIFTAPOX1 689 (+) ATATT S000098
SEF1MOTIF 706 (+) ATATTTAWW S000006
ROOTMOTIFTAPOX1 706 (+) ATATT S000098
TATABOXOSPAL 707 (+) TATTTAA S000400
TATABOX2 716 (+) TATAAAT S000109
ARR1AT 754 (+) NGATT S000454
SEF4MOTIFGM7S 756 (+) RTTTTTR S000103
SEF1MOTIF 765 (+) ATATTTAWW S000006
ROOTMOTIFTAPOX1 765 (+) ATATT S000098
POLASIG1 775 (+) AATAAA S000080
CCAATBOX1 816 (+) CCAAT S000030
CAATBOX1 817 (+) CAAT S000028
ATHB1ATCONSENSUS 817 (+) CAATWATTG S000317
ATHB5ATCORE 817 (+) CAATNATTG S000371
EBOXBNNAPA 843 (+) CANNTG S000144
MYCCONSENSUSAT 843 (+) CANNTG S000407
CACTFTPPCA1 869 (+) YACT S000449
PREATPRODH 870 (+) ACTCAT S000450
EBOXBNNAPA 873 (+) CANNTG S000144
MYCCONSENSUSAT 873 (+) CANNTG S000407
MYCATERD1 873 (+) CATGTG S000413
WBOXATNPR1 880 (+) TTGAC S000390
WBOXHVISO1 881 (+) TGACT S000442
WRKY71OS 881 (+) TGAC S000447
WBOXNTERF3 881 (+) TGACY S000457
TAAAGSTKST1 898 (+) TAAAG S000387
DOFCOREZM 899 (+) AAAG S000265
GT1CONSENSUS 927 (+) GRWAAW S000198
RYREPEATLEGUMINBOX 939 (+) CATGCAY S000100
RYREPEATGMGY2 939 (+) CATGCAT S000105
RYREPEATBNNAPA 939 (+) CATGCA S000264
ANAERO1CONSENSUS 951 (+) AAACAAA S000477
AACACOREOSGLUB1 952 (+) AACAAAC S000353
TATABOX5 965 (+) TTATTT S000203
DOFCOREZM 984 (+) AAAG S000265
ACGTATERD1 989 (+) ACGT S000415
ROOTMOTIFTAPOX1 1002 (+) ATATT S000098
ARR1AT 1027 (+) NGATT S000454
TATABOX5 1030 (+) TTATTT S000203
MARTBOX 1034 (+) TTWTWTTWTT S000067
TATABOX5 1034 (+) TTATTT S000203
MARTBOX 1054 (+) TTWTWTTWTT S000067
ROOTMOTIFTAPOX1 1056 (+) ATATT S000098
SEF4MOTIFGM7S 1058 (+) RTTTTTR S000103
WBBOXPCWRKY1 1067 (+) TTTGACY S000310
ELRECOREPCRP1 1068 (+) TTGACC S000142
WBOXATNPR1 1068 (+) TTGAC S000390
WRKY71OS 1069 (+) TGAC S000447
WBOXNTERF3 1069 (+) TGACY S000457
POLASIG1 1124 (+) AATAAA S000080
SORLREP3AT 1135 (+) TGTATATAT S000488
TATABOX4 1139 (+) TATATAA S000111
POLASIG1 1146 (+) AATAAA S000080
CACTFTPPCA1 1165 (+) YACT S000449
CARGCW8GAT 1167 (+) CWWWWWWWWG S000431
-10PEHVPSBD 1185 (+) TATTCT S000392
GATABOX 1192 (+) GATA S000039
IBOXCORE 1192 (+) GATAA S000199
WBOXHVISO1 1201 (+) TGACT S000442
WRKY71OS 1201 (+) TGAC S000447
WBOXNTERF3 1201 (+) TGACY S000457
EECCRCAH1 1202 (+) GANTTNC S000494
MYB2CONSENSUSAT 1224 (+) YAACKG S000409
MYBCOREATCYCB1 1225 (+) AACGG S000502
TAAAGSTKST1 1234 (+) TAAAG S000387
DOFCOREZM 1235 (+) AAAG S000265
WBOXATNPR1 1239 (+) TTGAC S000390
WBOXHVISO1 1240 (+) TGACT S000442
WRKY71OS 1240 (+) TGAC S000447
WBOXNTERF3 1240 (+) TGACY S000457
ACGTATERD1 1259 (+) ACGT S000415
CURECORECR 1261 (+) GTAC S000493
CACTFTPPCA1 1262 (+) YACT S000449
CACTFTPPCA1 1267 (+) YACT S000449
CACTFTPPCA1 1277 (+) YACT S000449
HDZIP2ATATHB2 1292 (+) TAATMATTA S000373
GATABOX 1337 (+) GATA S000039
ROOTMOTIFTAPOX1 1363 (+) ATATT S000098
ROOTMOTIFTAPOX1 1383 (+) ATATT S000098
SEF4MOTIFGM7S 1385 (+) RTTTTTR S000103
ARR1AT 1403 (+) NGATT S000454
POLASIG1 1408 (+) AATAAA S000080
CACTFTPPCA1 1419 (+) YACT S000449
INRNTPSADB 1425 (+) YTCANTYY S000395
CAATBOX1 1427 (+) CAAT S000028
ARR1AT 1437 (+) NGATT S000454
CACTFTPPCA1 1451 (+) YACT S000449
POLASIG1 1471 (+) AATAAA S000080
DOFCOREZM 1476 (+) AAAG S000265
ERELEE4 1480 (+) AWTTCAAA S000037
2SSEEDPROTBANAPA 1484 (+) CAAACAC S000143
CANBNNAPA 1484 (+) CNAACAC S000148
CACTFTPPCA1 1488 (+) YACT S000449
GT1CONSENSUS 1502 (+) GRWAAW S000198
GT1GMSCAM4 1502 (+) GAAAAA S000453
GTGANTG10 1516 (+) GTGA S000378
WRKY71OS 1517 (+) TGAC S000447
S1FBOXSORPS1L21 1530 (+) ATGGTA S000223
GT1CONSENSUS 1532 (+) GRWAAW S000198
GTGANTG10 1544 (+) GTGA S000378
RHERPATEXPA7 1549 (+) KCACGW S000512
CACGTGMOTIF 1550 (+) CACGTG S000042
EBOXBNNAPA 1550 (+) CANNTG S000144
MYCCONSENSUSAT 1550 (+) CANNTG S000407
ABRELATERD1 1551 (+) ACGTG S000414
ACGTATERD1 1551 (+) ACGT S000415
GTGANTG10 1553 (+) GTGA S000378
CACTFTPPCA1 1569 (+) YACT S000449
ANAERO3CONSENSUS 1581 (+) TCATCAC S000479
CACTFTPPCA1 1598 (+) YACT S000449
TBOXATGAPB 1599 (+) ACTTTG S000383
CAATBOX1 1634 (+) CAAT S000028
CACTFTPPCA1 1663 (+) YACT S000449
DOFCOREZM 1675 (+) AAAG S000265

## Sheet: Araip.0P3RJ
MARTBOX 8 (+) TTWTWTTWTT S000067
TATABOX3 14 (+) TATTAAT S000110
EBOXBNNAPA 22 (+) CANNTG S000144
MYCCONSENSUSAT 22 (+) CANNTG S000407
GTGANTG10 25 (+) GTGA S000378
GT1CONSENSUS 27 (+) GRWAAW S000198
GT1GMSCAM4 27 (+) GAAAAA S000453
SEF4MOTIFGM7S 52 (+) RTTTTTR S000103
DOFCOREZM 59 (+) AAAG S000265
NODCON1GM 59 (+) AAAGAT S000461
OSE1ROOTNODULE 59 (+) AAAGAT S000467
GATABOX 62 (+) GATA S000039
GT1CONSENSUS 62 (+) GRWAAW S000198
IBOXCORE 62 (+) GATAA S000199
ARR1AT 70 (+) NGATT S000454
LECPLEACS2 88 (+) TAAAATAT S000465
SEF1MOTIF 92 (+) ATATTTAWW S000006
ROOTMOTIFTAPOX1 92 (+) ATATT S000098
TATABOXOSPAL 93 (+) TATTTAA S000400
TAAAGSTKST1 97 (+) TAAAG S000387
DOFCOREZM 98 (+) AAAG S000265
NODCON1GM 98 (+) AAAGAT S000461
OSE1ROOTNODULE 98 (+) AAAGAT S000467
ARR1AT 107 (+) NGATT S000454
GATABOX 116 (+) GATA S000039
CACTFTPPCA1 118 (+) YACT S000449
ROOTMOTIFTAPOX1 129 (+) ATATT S000098
ARR1AT 145 (+) NGATT S000454
MYB1AT 191 (+) WAACCA S000408
ARR1AT 196 (+) NGATT S000454
E2FCONSENSUS 206 (+) WTTSSCSS S000476
CAATBOX1 223 (+) CAAT S000028
CAATBOX1 233 (+) CAAT S000028
CACTFTPPCA1 253 (+) YACT S000449
RHERPATEXPA7 260 (+) KCACGW S000512
ACGTATERD1 262 (+) ACGT S000415
ROOTMOTIFTAPOX1 267 (+) ATATT S000098
TATABOX5 277 (+) TTATTT S000203
TATABOX3 289 (+) TATTAAT S000110
EBOXBNNAPA 312 (+) CANNTG S000144
CATATGGMSAUR 312 (+) CATATG S000370
MYCCONSENSUSAT 312 (+) CANNTG S000407
GATABOX 317 (+) GATA S000039
GT1CONSENSUS 317 (+) GRWAAW S000198
IBOXCORE 317 (+) GATAA S000199
MARTBOX 326 (+) TTWTWTTWTT S000067
TATABOX5 326 (+) TTATTT S000203
MARTBOX 338 (+) TTWTWTTWTT S000067
ROOTMOTIFTAPOX1 351 (+) ATATT S000098
-10PEHVPSBD 352 (+) TATTCT S000392
ROOTMOTIFTAPOX1 365 (+) ATATT S000098
TATABOX5 371 (+) TTATTT S000203
WBOXHVISO1 381 (+) TGACT S000442
WRKY71OS 381 (+) TGAC S000447
WBOXNTERF3 381 (+) TGACY S000457
MARTBOX 385 (+) TTWTWTTWTT S000067
TATABOX5 390 (+) TTATTT S000203
CACTFTPPCA1 430 (+) YACT S000449
ROOTMOTIFTAPOX1 434 (+) ATATT S000098
TATABOX2 448 (+) TATAAAT S000109
SEF1MOTIF 455 (+) ATATTTAWW S000006
ROOTMOTIFTAPOX1 455 (+) ATATT S000098
TATABOXOSPAL 456 (+) TATTTAA S000400
TATABOX5 521 (+) TTATTT S000203
SEF4MOTIFGM7S 523 (+) RTTTTTR S000103
CAATBOX1 537 (+) CAAT S000028
CAATBOX1 569 (+) CAAT S000028
TATABOX2 574 (+) TATAAAT S000109
ROOTMOTIFTAPOX1 579 (+) ATATT S000098
TATABOX3 580 (+) TATTAAT S000110
DPBFCOREDCDC3 595 (+) ACACNNG S000292
EBOXBNNAPA 596 (+) CANNTG S000144
MYCCONSENSUSAT 596 (+) CANNTG S000407
CACTFTPPCA1 596 (+) YACT S000449
GATABOX 601 (+) GATA S000039
GT1CONSENSUS 601 (+) GRWAAW S000198
IBOXCORE 601 (+) GATAA S000199
RAV1AAT 616 (+) CAACA S000314
CARGCW8GAT 636 (+) CWWWWWWWWG S000431
DOFCOREZM 642 (+) AAAG S000265
NODCON2GM 658 (+) CTCTT S000462
OSE2ROOTNODULE 658 (+) CTCTT S000468
CACTFTPPCA1 681 (+) YACT S000449
-300ELEMENT 697 (+) TGHAAARK S000122
DOFCOREZM 701 (+) AAAG S000265
POLLEN1LELAT52 705 (+) AGAAA S000245
GT1CONSENSUS 706 (+) GRWAAW S000198
GT1GMSCAM4 706 (+) GAAAAA S000453
DOFCOREZM 710 (+) AAAG S000265
RAV1AAT 716 (+) CAACA S000314
CAATBOX1 719 (+) CAAT S000028
SEF4MOTIFGM7S 723 (+) RTTTTTR S000103
CACTFTPPCA1 738 (+) YACT S000449
CACTFTPPCA1 742 (+) YACT S000449
GTGANTG10 752 (+) GTGA S000378
GATABOX 754 (+) GATA S000039
IBOXCORE 754 (+) GATAA S000199
CACTFTPPCA1 759 (+) YACT S000449
CURECORECR 769 (+) GTAC S000493
CACTFTPPCA1 781 (+) YACT S000449
RAV1AAT 786 (+) CAACA S000314
TAAAGSTKST1 799 (+) TAAAG S000387
DOFCOREZM 800 (+) AAAG S000265
SBOXATRBCS 861 (+) CACCTCCA S000500
NODCON2GM 870 (+) CTCTT S000462
OSE2ROOTNODULE 870 (+) CTCTT S000468
CACTFTPPCA1 892 (+) YACT S000449
AUXREPSIAA4 922 (+) KGTCCCAT S000026
GGTCCCATGMSAUR 922 (+) GGTCCCAT S000360
INRNTPSADB 933 (+) YTCANTYY S000395
CACTFTPPCA1 935 (+) YACT S000449
CACTFTPPCA1 940 (+) YACT S000449
TBOXATGAPB 941 (+) ACTTTG S000383
NODCON2GM 948 (+) CTCTT S000462
OSE2ROOTNODULE 948 (+) CTCTT S000468
HSELIKENTACIDICPR1 977 (+) CNNGAANNNTTCNNG S000056
NODCON2GM 992 (+) CTCTT S000462
OSE2ROOTNODULE 992 (+) CTCTT S000468
SEF3MOTIFGM 1003 (+) AACCCA S000115
SORLIP1AT 1013 (+) GCCAC S000482
CACTFTPPCA1 1015 (+) YACT S000449
RAV1AAT 1024 (+) CAACA S000314
DPBFCOREDCDC3 1026 (+) ACACNNG S000292
CACTFTPPCA1 1027 (+) YACT S000449
GARE2OSREP1 1060 (+) TAACGTA S000420
ACGTATERD1 1062 (+) ACGT S000415
CURECORECR 1064 (+) GTAC S000493
CAREOSREP1 1070 (+) CAACTC S000421
HEXAMERATH4 1075 (+) CCGTCG S000146
S1FBOXSORPS1L21 1083 (+) ATGGTA S000223
CURECORECR 1086 (+) GTAC S000493
CACTFTPPCA1 1101 (+) YACT S000449
POLLEN1LELAT52 1116 (+) AGAAA S000245
DOFCOREZM 1118 (+) AAAG S000265
SORLIP1AT 1147 (+) GCCAC S000482
EBOXBNNAPA 1154 (+) CANNTG S000144
MYBCORE 1154 (+) CNGTTR S000176
MYCCONSENSUSAT 1154 (+) CANNTG S000407
ARR1AT 1187 (+) NGATT S000454
POLLEN1LELAT52 1193 (+) AGAAA S000245
DOFCOREZM 1195 (+) AAAG S000265
DOFCOREZM 1204 (+) AAAG S000265
2SSEEDPROTBANAPA 1232 (+) CAAACAC S000143
CANBNNAPA 1232 (+) CNAACAC S000148
PROXBBNNAPA 1232 (+) CAAACACC S000263
DPBFCOREDCDC3 1235 (+) ACACNNG S000292
HEXAMERATH4 1239 (+) CCGTCG S000146
CRTDREHVCBF2 1241 (+) GTCGAC S000411
CBFHV 1241 (+) RYCGAC S000497
RAV1AAT 1273 (+) CAACA S000314

## Sheet: Araip.XGB85
TATABOX2 8 (+) TATAAAT S000109
TATABOX5 28 (+) TTATTT S000203
TATABOX5 32 (+) TTATTT S000203
ROOTMOTIFTAPOX1 68 (+) ATATT S000098
-10PEHVPSBD 69 (+) TATTCT S000392
TATABOX3 74 (+) TATTAAT S000110
TAAAGSTKST1 82 (+) TAAAG S000387
DOFCOREZM 83 (+) AAAG S000265
CURECORECR 89 (+) GTAC S000493
CACTFTPPCA1 90 (+) YACT S000449
BIHD1OS 108 (+) TGTCA S000498
TATABOX4 136 (+) TATATAA S000111
CACTFTPPCA1 143 (+) YACT S000449
CANBNNAPA 145 (+) CNAACAC S000148
CACTFTPPCA1 149 (+) YACT S000449
CACTFTPPCA1 155 (+) YACT S000449
ARR1AT 169 (+) NGATT S000454
CACTFTPPCA1 182 (+) YACT S000449
RAV1AAT 190 (+) CAACA S000314
ARR1AT 200 (+) NGATT S000454
EBOXBNNAPA 207 (+) CANNTG S000144
MYCCONSENSUSAT 207 (+) CANNTG S000407
SEBFCONSSTPR10A 219 (+) YTGTCWC S000391
BIHD1OS 220 (+) TGTCA S000498
CACTFTPPCA1 223 (+) YACT S000449
ROOTMOTIFTAPOX1 230 (+) ATATT S000098
RHERPATEXPA7 256 (+) KCACGW S000512
ACGTATERD1 258 (+) ACGT S000415
TATABOX3 273 (+) TATTAAT S000110
POLASIG3 277 (+) AATAAT S000088
EBOXBNNAPA 330 (+) CANNTG S000144
MYCATRD22 330 (+) CACATG S000174
MYCCONSENSUSAT 330 (+) CANNTG S000407
ARR1AT 380 (+) NGATT S000454
GT1CONSENSUS 395 (+) GRWAAW S000198
REALPHALGLHCB21 410 (+) AACCAA S000362
CCAATBOX1 412 (+) CCAAT S000030
CAATBOX1 413 (+) CAAT S000028
ARR1AT 417 (+) NGATT S000454
CACTFTPPCA1 437 (+) YACT S000449
DOFCOREZM 450 (+) AAAG S000265
DOFCOREZM 459 (+) AAAG S000265
CURECORECR 467 (+) GTAC S000493
CAATBOX1 480 (+) CAAT S000028
EBOXBNNAPA 480 (+) CANNTG S000144
MYCCONSENSUSAT 480 (+) CANNTG S000407
ARR1AT 496 (+) NGATT S000454
CAATBOX1 507 (+) CAAT S000028
GATABOX 536 (+) GATA S000039
POLASIG2 550 (+) AATTAAA S000081
POLASIG1 559 (+) AATAAA S000080
ARR1AT 580 (+) NGATT S000454
ROOTMOTIFTAPOX1 594 (+) ATATT S000098
CACTFTPPCA1 623 (+) YACT S000449
RAV1AAT 632 (+) CAACA S000314
ARR1AT 639 (+) NGATT S000454
INRNTPSADB 650 (+) YTCANTYY S000395
TATABOX5 658 (+) TTATTT S000203
NTBBF1ARROLB 670 (+) ACTTTA S000273
CACTFTPPCA1 676 (+) YACT S000449
SEF4MOTIFGM7S 684 (+) RTTTTTR S000103
ROOTMOTIFTAPOX1 710 (+) ATATT S000098
TATABOX5 738 (+) TTATTT S000203
DOFCOREZM 753 (+) AAAG S000265
NODCON1GM 753 (+) AAAGAT S000461
OSE1ROOTNODULE 753 (+) AAAGAT S000467
TATABOX3 762 (+) TATTAAT S000110
ROOTMOTIFTAPOX1 776 (+) ATATT S000098
SEF3MOTIFGM 784 (+) AACCCA S000115
CCAATBOX1 787 (+) CCAAT S000030
CAATBOX1 788 (+) CAAT S000028
RBCSCONSENSUS 789 (+) AATCCAA S000127
INRNTPSADB 802 (+) YTCANTYY S000395
CARGCW8GAT 804 (+) CWWWWWWWWG S000431
EBOXBNNAPA 816 (+) CANNTG S000144
MYCCONSENSUSAT 816 (+) CANNTG S000407
ARR1AT 826 (+) NGATT S000454
GATABOX 837 (+) GATA S000039
GT1CONSENSUS 837 (+) GRWAAW S000198
IBOXCORE 837 (+) GATAA S000199
HDZIP2ATATHB2 839 (+) TAATMATTA S000373
POLASIG3 840 (+) AATAAT S000088
CACTFTPPCA1 846 (+) YACT S000449
INRNTPSADB 849 (+) YTCANTYY S000395
CAATBOX1 851 (+) CAAT S000028
POLASIG3 863 (+) AATAAT S000088
INRNTPSADB 878 (+) YTCANTYY S000395
CAATBOX1 880 (+) CAAT S000028
TATABOX5 899 (+) TTATTT S000203
CACTFTPPCA1 908 (+) YACT S000449
TATABOX5 1008 (+) TTATTT S000203
GT1CORE 1015 (+) GGTTAA S000125
POLASIG3 1019 (+) AATAAT S000088
POLASIG1 1022 (+) AATAAA S000080
CCAATBOX1 1045 (+) CCAAT S000030
CAATBOX1 1046 (+) CAAT S000028
POLASIG1 1047 (+) AATAAA S000080
CAATBOX1 1123 (+) CAAT S000028
POLASIG1 1124 (+) AATAAA S000080
CAATBOX1 1143 (+) CAAT S000028
CAATBOX1 1149 (+) CAAT S000028
CACTFTPPCA1 1155 (+) YACT S000449
BIHD1OS 1159 (+) TGTCA S000498
SP8BFIBSP8BIB 1168 (+) TACTATT S000184
CACTFTPPCA1 1168 (+) YACT S000449
TATABOXOSPAL 1171 (+) TATTTAA S000400
MARABOX1 1192 (+) AATAAAYAAA S000063
POLASIG1 1192 (+) AATAAA S000080
MARABOX1 1196 (+) AATAAAYAAA S000063
POLASIG1 1196 (+) AATAAA S000080
MARABOX1 1200 (+) AATAAAYAAA S000063
POLASIG1 1200 (+) AATAAA S000080
MARABOX1 1204 (+) AATAAAYAAA S000063
POLASIG1 1204 (+) AATAAA S000080
POLASIG1 1208 (+) AATAAA S000080
TATABOX5 1226 (+) TTATTT S000203
AMYBOX1 1253 (+) TAACARA S000020
MYBGAHV 1253 (+) TAACAAA S000181
GAREAT 1253 (+) TAACAAR S000439
TATAPVTRNALEU 1264 (+) TTTATATA S000340
TATABOX4 1268 (+) TATATAA S000111
DOFCOREZM 1274 (+) AAAG S000265
NODCON1GM 1274 (+) AAAGAT S000461
OSE1ROOTNODULE 1274 (+) AAAGAT S000467
GATABOX 1277 (+) GATA S000039
GT1CONSENSUS 1277 (+) GRWAAW S000198
IBOXCORE 1277 (+) GATAA S000199
DOFCOREZM 1283 (+) AAAG S000265
TATABOXOSPAL 1302 (+) TATTTAA S000400
MYBST1 1318 (+) GGATA S000180
GATABOX 1319 (+) GATA S000039
GT1CONSENSUS 1319 (+) GRWAAW S000198
IBOXCORE 1319 (+) GATAA S000199
TAAAGSTKST1 1321 (+) TAAAG S000387
DOFCOREZM 1322 (+) AAAG S000265
CACTFTPPCA1 1344 (+) YACT S000449
DOFCOREZM 1350 (+) AAAG S000265
CPBCSPOR 1367 (+) TATTAG S000491

## Sheet: Araip.327XS
INRNTPSADB 8 (+) YTCANTYY S000395
NTBBF1ARROLB 27 (+) ACTTTA S000273
SEF1MOTIF 34 (+) ATATTTAWW S000006
ROOTMOTIFTAPOX1 34 (+) ATATT S000098
TATABOX5 38 (+) TTATTT S000203
SURECOREATSULTR11 57 (+) GAGAC S000499
DOFCOREZM 75 (+) AAAG S000265
ACGTABOX 87 (+) TACGTA S000130
ACGTATERD1 88 (+) ACGT S000415
ELRECOREPCRP1 117 (+) TTGACC S000142
WBOXATNPR1 117 (+) TTGAC S000390
WRKY71OS 118 (+) TGAC S000447
WBOXNTERF3 118 (+) TGACY S000457
SEF4MOTIFGM7S 130 (+) RTTTTTR S000103
BIHD1OS 135 (+) TGTCA S000498
SEF4MOTIFGM7S 152 (+) RTTTTTR S000103
CURECORECR 169 (+) GTAC S000493
RYREPEATBNNAPA 178 (+) CATGCA S000264
MYBST1 193 (+) GGATA S000180
GATABOX 194 (+) GATA S000039
GT1CONSENSUS 194 (+) GRWAAW S000198
IBOXCORE 194 (+) GATAA S000199
MYBCORE 207 (+) CNGTTR S000176
CURECORECR 212 (+) GTAC S000493
CACTFTPPCA1 213 (+) YACT S000449
-300CORE 219 (+) TGTAAAG S000001
-300ELEMENT 219 (+) TGHAAARK S000122
TAAAGSTKST1 221 (+) TAAAG S000387
DOFCOREZM 222 (+) AAAG S000265
EBOXBNNAPA 230 (+) CANNTG S000144
MYCCONSENSUSAT 230 (+) CANNTG S000407
GT1CONSENSUS 235 (+) GRWAAW S000198
CAATBOX1 246 (+) CAAT S000028
CAATBOX1 258 (+) CAAT S000028
CACTFTPPCA1 262 (+) YACT S000449
BIHD1OS 268 (+) TGTCA S000498
TATABOX5 304 (+) TTATTT S000203
DOFCOREZM 312 (+) AAAG S000265
CACTFTPPCA1 337 (+) YACT S000449
ARR1AT 362 (+) NGATT S000454
CARGCW8GAT 411 (+) CWWWWWWWWG S000431
SORLIP1AT 422 (+) GCCAC S000482
CACGCAATGMGH3 424 (+) CACGCAAT S000368
CAATBOX1 428 (+) CAAT S000028
INTRONLOWER 431 (+) TGCAGG S000086
MYBST1 441 (+) GGATA S000180
GATABOX 442 (+) GATA S000039
MYBPZM 462 (+) CCWACC S000179
REALPHALGLHCB21 464 (+) AACCAA S000362
CCAATBOX1 466 (+) CCAAT S000030
CAATBOX1 467 (+) CAAT S000028
POLASIG3 468 (+) AATAAT S000088
GTGANTG10 479 (+) GTGA S000378
GATABOX 481 (+) GATA S000039
GT1CONSENSUS 481 (+) GRWAAW S000198
IBOXCORE 481 (+) GATAA S000199
MYBST1 490 (+) GGATA S000180
GATABOX 491 (+) GATA S000039
GATABOX 495 (+) GATA S000039
ARR1AT 498 (+) NGATT S000454
POLLEN1LELAT52 504 (+) AGAAA S000245
POLASIG1 507 (+) AATAAA S000080
ACGTROOT1 518 (+) GCCACGTGGC S000016
SORLIP1AT 518 (+) GCCAC S000482
GBOXLERBCS 519 (+) MCACGTGGC S000041
ABREZMRAB28 519 (+) CCACGTGG S000133
CACGTGMOTIF 520 (+) CACGTG S000042
EMBP1TAEM 520 (+) CACGTGGC S000119
EBOXBNNAPA 520 (+) CANNTG S000144
ABREATCONSENSUS 520 (+) YACGTGGC S000406
MYCCONSENSUSAT 520 (+) CANNTG S000407
IRO2OS 520 (+) CACGTGG S000505
ABRERATCAL 520 (+) MACGYGB S000507
BOXIIPCCHS 521 (+) ACGTGGC S000229
LRENPCABE 521 (+) ACGTGGCA S000231
ACGTABREMOTIFA2OSEM 521 (+) ACGTGKC S000394
ABRELATERD1 521 (+) ACGTG S000414
ACGTATERD1 521 (+) ACGT S000415
GATABOX 529 (+) GATA S000039
ARR1AT 533 (+) NGATT S000454
RYREPEATLEGUMINBOX 539 (+) CATGCAY S000100
RYREPEATBNNAPA 539 (+) CATGCA S000264
RHERPATEXPA7 542 (+) KCACGW S000512
ACGTATERD1 544 (+) ACGT S000415
CBFHV 561 (+) RYCGAC S000497
MYBCORE 589 (+) CNGTTR S000176
BIHD1OS 593 (+) TGTCA S000498
RAV1AAT 596 (+) CAACA S000314
RAV1AAT 599 (+) CAACA S000314
DOFCOREZM 604 (+) AAAG S000265
SORLIP1AT 607 (+) GCCAC S000482
MYBPZM 629 (+) CCWACC S000179

## Sheet: Araip.N6ZTJ
GATABOX 21 (+) GATA S000039
GT1CONSENSUS 21 (+) GRWAAW S000198
IBOXCORE 21 (+) GATAA S000199
CACTFTPPCA1 27 (+) YACT S000449
TATABOX5 62 (+) TTATTT S000203
CACTFTPPCA1 74 (+) YACT S000449
MYB1AT 86 (+) WAACCA S000408
MARTBOX 105 (+) TTWTWTTWTT S000067
TATABOX5 105 (+) TTATTT S000203
CARGCW8GAT 124 (+) CWWWWWWWWG S000431
CURECORECR 149 (+) GTAC S000493
TATABOX5 183 (+) TTATTT S000203
ARR1AT 208 (+) NGATT S000454
SEF4MOTIFGM7S 210 (+) RTTTTTR S000103
EBOXBNNAPA 221 (+) CANNTG S000144
MYCCONSENSUSAT 221 (+) CANNTG S000407
GTGANTG10 224 (+) GTGA S000378
GATABOX 226 (+) GATA S000039
CAATBOX1 246 (+) CAAT S000028
CAATBOX1 282 (+) CAAT S000028
AMMORESIIUDCRNIA1 287 (+) GGWAGGGT S000374
AMMORESIIUDCRNIA1 292 (+) GGWAGGGT S000374
MYBPZM 317 (+) CCWACC S000179
GT1CORE 328 (+) GGTTAA S000125
DOFCOREZM 345 (+) AAAG S000265
CAREOSREP1 390 (+) CAACTC S000421
TAAAGSTKST1 414 (+) TAAAG S000387
DOFCOREZM 415 (+) AAAG S000265
UP2ATMSD 423 (+) AAACCCTA S000472
CACTFTPPCA1 431 (+) YACT S000449
LTRECOREATCOR15 437 (+) CCGAC S000153
SREATMSD 443 (+) TTATCC S000470
POLLEN1LELAT52 451 (+) AGAAA S000245
ANAERO1CONSENSUS 453 (+) AAACAAA S000477
ERELEE4 465 (+) AWTTCAAA S000037
POLASIG1 471 (+) AATAAA S000080
RAV1AAT 487 (+) CAACA S000314
CAATBOX1 490 (+) CAAT S000028
ERELEE4 492 (+) AWTTCAAA S000037
ROOTMOTIFTAPOX1 508 (+) ATATT S000098
TATABOX3 509 (+) TATTAAT S000110
POLASIG1 513 (+) AATAAA S000080
SURE1STPAT21 518 (+) AATAGAAAA S000186
BOXIINTPATPB 519 (+) ATAGAA S000296
POLLEN1LELAT52 521 (+) AGAAA S000245
GT1CONSENSUS 522 (+) GRWAAW S000198
POLASIG1 525 (+) AATAAA S000080
POLASIG2 543 (+) AATTAAA S000081
POLASIG2 549 (+) AATTAAA S000081
POLASIG3 556 (+) AATAAT S000088
POLASIG1 559 (+) AATAAA S000080
POLASIG1 572 (+) AATAAA S000080
RBCSCONSENSUS 576 (+) AATCCAA S000127
RAV1AAT 580 (+) CAACA S000314
POLASIG3 595 (+) AATAAT S000088
CAATBOX1 609 (+) CAAT S000028
TATABOX5 623 (+) TTATTT S000203
SEF4MOTIFGM7S 632 (+) RTTTTTR S000103
GTGANTG10 653 (+) GTGA S000378
CURECORECR 657 (+) GTAC S000493
ARR1AT 662 (+) NGATT S000454
EECCRCAH1 663 (+) GANTTNC S000494
CACTFTPPCA1 667 (+) YACT S000449
CACTFTPPCA1 676 (+) YACT S000449
ROOTMOTIFTAPOX1 701 (+) ATATT S000098
TATABOX4 705 (+) TATATAA S000111
ROOTMOTIFTAPOX1 713 (+) ATATT S000098
CURECORECR 759 (+) GTAC S000493
MYBPZM 763 (+) CCWACC S000179
MYBPZM 776 (+) CCWACC S000179
CIACADIANLELHC 800 (+) CAANNNNATC S000252
MYBCOREATCYCB1 813 (+) AACGG S000502
GATABOX 832 (+) GATA S000039
IBOX 832 (+) GATAAG S000124
IBOXCORE 832 (+) GATAA S000199
IBOXCORENT 832 (+) GATAAGR S000424
CURECORECR 838 (+) GTAC S000493
ROOTMOTIFTAPOX1 842 (+) ATATT S000098
DOFCOREZM 859 (+) AAAG S000265
TATAPVTRNALEU 865 (+) TTTATATA S000340
ROOTMOTIFTAPOX1 870 (+) ATATT S000098
DOFCOREZM 885 (+) AAAG S000265
TAAAGSTKST1 892 (+) TAAAG S000387
DOFCOREZM 893 (+) AAAG S000265
NODCON1GM 893 (+) AAAGAT S000461
OSE1ROOTNODULE 893 (+) AAAGAT S000467
MARARS 901 (+) WTTTATRTTTW S000064
SEF1MOTIF 905 (+) ATATTTAWW S000006
ROOTMOTIFTAPOX1 905 (+) ATATT S000098
TATABOXOSPAL 906 (+) TATTTAA S000400
GATABOX 917 (+) GATA S000039
IBOX 917 (+) GATAAG S000124
IBOXCORE 917 (+) GATAA S000199
IBOXCORENT 917 (+) GATAAGR S000424
ARR1AT 923 (+) NGATT S000454
EECCRCAH1 924 (+) GANTTNC S000494
CACTFTPPCA1 928 (+) YACT S000449
DOFCOREZM 950 (+) AAAG S000265
TATABOX5 962 (+) TTATTT S000203
CAATBOX1 980 (+) CAAT S000028
ROOTMOTIFTAPOX1 982 (+) ATATT S000098
TATABOX5 985 (+) TTATTT S000203
ACGTATERD1 1010 (+) ACGT S000415
GT1CONSENSUS 1033 (+) GRWAAW S000198
GT1GMSCAM4 1033 (+) GAAAAA S000453
DOFCOREZM 1037 (+) AAAG S000265
AMYBOX1 1054 (+) TAACARA S000020
MYBGAHV 1054 (+) TAACAAA S000181
GAREAT 1054 (+) TAACAAR S000439
POLLEN1LELAT52 1066 (+) AGAAA S000245
DOFCOREZM 1069 (+) AAAG S000265
NODCON1GM 1069 (+) AAAGAT S000461
OSE1ROOTNODULE 1069 (+) AAAGAT S000467
GATABOX 1072 (+) GATA S000039
IBOX 1072 (+) GATAAG S000124
IBOXCORE 1072 (+) GATAA S000199
IBOXCORENT 1072 (+) GATAAGR S000424
CAATBOX1 1079 (+) CAAT S000028
SEF4MOTIFGM7S 1090 (+) RTTTTTR S000103
SEF4MOTIFGM7S 1111 (+) RTTTTTR S000103
TATABOX5 1121 (+) TTATTT S000203
SEF4MOTIFGM7S 1123 (+) RTTTTTR S000103
-10PEHVPSBD 1139 (+) TATTCT S000392
CACTFTPPCA1 1154 (+) YACT S000449
NTBBF1ARROLB 1155 (+) ACTTTA S000273
ROOTMOTIFTAPOX1 1160 (+) ATATT S000098
ARFAT 1178 (+) TGTCTC S000270
BIHD1OS 1186 (+) TGTCA S000498
NTBBF1ARROLB 1197 (+) ACTTTA S000273
GTGANTG10 1229 (+) GTGA S000378
AMYBOX2 1238 (+) TATCCAT S000021
TATCCAYMOTIFOSRAMY3D 1238 (+) TATCCAY S000256
TATCCAOSAMY 1238 (+) TATCCA S000403
SEF1MOTIF 1268 (+) ATATTTAWW S000006
ROOTMOTIFTAPOX1 1268 (+) ATATT S000098
TATABOXOSPAL 1269 (+) TATTTAA S000400
GT1CONSENSUS 1297 (+) GRWAAW S000198
GT1GMSCAM4 1297 (+) GAAAAA S000453
DOFCOREZM 1301 (+) AAAG S000265
GATABOX 1308 (+) GATA S000039
RAV1AAT 1328 (+) CAACA S000314
DPBFCOREDCDC3 1330 (+) ACACNNG S000292
POLLEN1LELAT52 1335 (+) AGAAA S000245
DOFCOREZM 1337 (+) AAAG S000265
NODCON1GM 1337 (+) AAAGAT S000461
OSE1ROOTNODULE 1337 (+) AAAGAT S000467
EECCRCAH1 1350 (+) GANTTNC S000494
ACGTROOT1 1355 (+) GCCACGTGGC S000016
SORLIP1AT 1355 (+) GCCAC S000482
GBOXLERBCS 1356 (+) MCACGTGGC S000041
ABREZMRAB28 1356 (+) CCACGTGG S000133
CACGTGMOTIF 1357 (+) CACGTG S000042
EMBP1TAEM 1357 (+) CACGTGGC S000119
EBOXBNNAPA 1357 (+) CANNTG S000144
ABREATCONSENSUS 1357 (+) YACGTGGC S000406
MYCCONSENSUSAT 1357 (+) CANNTG S000407
IRO2OS 1357 (+) CACGTGG S000505
ABRERATCAL 1357 (+) MACGYGB S000507
BOXIIPCCHS 1358 (+) ACGTGGC S000229
LRENPCABE 1358 (+) ACGTGGCA S000231
ACGTABREMOTIFA2OSEM 1358 (+) ACGTGKC S000394
ABRELATERD1 1358 (+) ACGTG S000414
ACGTATERD1 1358 (+) ACGT S000415
CACTFTPPCA1 1367 (+) YACT S000449
SREATMSD 1388 (+) TTATCC S000470
LTRECOREATCOR15 1392 (+) CCGAC S000153
RBCSCONSENSUS 1411 (+) AATCCAA S000127
SEBFCONSSTPR10A 1420 (+) YTGTCWC S000391
ARFAT 1421 (+) TGTCTC S000270
GTGANTG10 1433 (+) GTGA S000378
WRKY71OS 1434 (+) TGAC S000447
CACTFTPPCA1 1475 (+) YACT S000449
MYBCORE 1511 (+) CNGTTR S000176
GAREAT 1515 (+) TAACAAR S000439
GTGANTG10 1530 (+) GTGA S000378
TAAAGSTKST1 1544 (+) TAAAG S000387
DOFCOREZM 1545 (+) AAAG S000265
POLLEN1LELAT52 1549 (+) AGAAA S000245

## Sheet: Aradu.5IY98
POLLEN1LELAT52 31 (+) AGAAA S000245
POLLEN1LELAT52 40 (+) AGAAA S000245
DPBFCOREDCDC3 68 (+) ACACNNG S000292
EBOXBNNAPA 69 (+) CANNTG S000144
MYCCONSENSUSAT 69 (+) CANNTG S000407
CACTFTPPCA1 69 (+) YACT S000449
ARR1AT 88 (+) NGATT S000454
CACTFTPPCA1 102 (+) YACT S000449
WBOXHVISO1 114 (+) TGACT S000442
WRKY71OS 114 (+) TGAC S000447
WBOXNTERF3 114 (+) TGACY S000457
TATABOXOSPAL 128 (+) TATTTAA S000400
GT1CORE 138 (+) GGTTAA S000125
MYB2AT 141 (+) TAACTG S000177
MYB2CONSENSUSAT 141 (+) YAACKG S000409
MYB2CONSENSUSAT 149 (+) YAACKG S000409
MYBCOREATCYCB1 150 (+) AACGG S000502
ARR1AT 163 (+) NGATT S000454
CGCGBOXAT 200 (+) VCGCGB S000501
CACTFTPPCA1 208 (+) YACT S000449
ARR1AT 232 (+) NGATT S000454
INRNTPSADB 237 (+) YTCANTYY S000395
ROOTMOTIFTAPOX1 246 (+) ATATT S000098
EBOXBNNAPA 265 (+) CANNTG S000144
MYCCONSENSUSAT 265 (+) CANNTG S000407
INTRONLOWER 269 (+) TGCAGG S000086
DOFCOREZM 309 (+) AAAG S000265
SORLREP3AT 348 (+) TGTATATAT S000488
SORLREP3AT 356 (+) TGTATATAT S000488
CACTFTPPCA1 375 (+) YACT S000449
CACTFTPPCA1 378 (+) YACT S000449
NODCON2GM 409 (+) CTCTT S000462
OSE2ROOTNODULE 409 (+) CTCTT S000468
CACTFTPPCA1 439 (+) YACT S000449
TBOXATGAPB 440 (+) ACTTTG S000383
GATABOX 445 (+) GATA S000039
ROOTMOTIFTAPOX1 446 (+) ATATT S000098
MYBST1 465 (+) GGATA S000180
GATABOX 466 (+) GATA S000039
SORLREP3AT 487 (+) TGTATATAT S000488
GCN4OSGLUB1 527 (+) TGAGTCA S000277
-10PEHVPSBD 568 (+) TATTCT S000392
CPBCSPOR 597 (+) TATTAG S000491
CAATBOX1 620 (+) CAAT S000028
SEF4MOTIFGM7S 661 (+) RTTTTTR S000103
ROOTMOTIFTAPOX1 683 (+) ATATT S000098
TATABOX5 709 (+) TTATTT S000203
CACTFTPPCA1 715 (+) YACT S000449
TAAAGSTKST1 723 (+) TAAAG S000387
DOFCOREZM 724 (+) AAAG S000265
-10PEHVPSBD 751 (+) TATTCT S000392
ROOTMOTIFTAPOX1 817 (+) ATATT S000098
SEF4MOTIFGM7S 819 (+) RTTTTTR S000103
TATABOX5 823 (+) TTATTT S000203
TATABOXOSPAL 824 (+) TATTTAA S000400
MARTBOX 832 (+) TTWTWTTWTT S000067
TATABOX5 834 (+) TTATTT S000203
SEF4MOTIFGM7S 836 (+) RTTTTTR S000103
TATAPVTRNALEU 839 (+) TTTATATA S000340
ROOTMOTIFTAPOX1 844 (+) ATATT S000098
SEF4MOTIFGM7S 846 (+) RTTTTTR S000103
SREATMSD 850 (+) TTATCC S000470
CACTFTPPCA1 883 (+) YACT S000449
GT1CONSENSUS 893 (+) GRWAAW S000198
CACTFTPPCA1 900 (+) YACT S000449
DOFCOREZM 905 (+) AAAG S000265
EBOXBNNAPA 910 (+) CANNTG S000144
MYCCONSENSUSAT 910 (+) CANNTG S000407
MYB2CONSENSUSAT 910 (+) YAACKG S000409
GATABOX 925 (+) GATA S000039
IBOXCORE 925 (+) GATAA S000199
TAAAGSTKST1 944 (+) TAAAG S000387
DOFCOREZM 945 (+) AAAG S000265
MARTBOX 965 (+) TTWTWTTWTT S000067
INRNTPSADB 978 (+) YTCANTYY S000395
CAATBOX1 980 (+) CAAT S000028
LECPLEACS2 1015 (+) TAAAATAT S000465
RAV1AAT 1044 (+) CAACA S000314
EECCRCAH1 1067 (+) GANTTNC S000494
POLASIG1 1098 (+) AATAAA S000080
DPBFCOREDCDC3 1104 (+) ACACNNG S000292
EBOXBNNAPA 1105 (+) CANNTG S000144
MYCATRD22 1105 (+) CACATG S000174
MYCCONSENSUSAT 1105 (+) CANNTG S000407
MYB1AT 1159 (+) WAACCA S000408
REALPHALGLHCB21 1160 (+) AACCAA S000362
CCAATBOX1 1162 (+) CCAAT S000030
LEAFYATAG 1162 (+) CCAATGT S000432
CAATBOX1 1163 (+) CAAT S000028
DOFCOREZM 1180 (+) AAAG S000265
SORLIP1AT 1183 (+) GCCAC S000482
CACGTGMOTIF 1185 (+) CACGTG S000042
EBOXBNNAPA 1185 (+) CANNTG S000144
MYCCONSENSUSAT 1185 (+) CANNTG S000407
ABRERATCAL 1185 (+) MACGYGB S000507
ABRELATERD1 1186 (+) ACGTG S000414
ACGTATERD1 1186 (+) ACGT S000415
POLASIG3 1194 (+) AATAAT S000088
CACTFTPPCA1 1199 (+) YACT S000449
CCAATBOX1 1204 (+) CCAAT S000030
CAATBOX1 1205 (+) CAAT S000028
INRNTPSADB 1208 (+) YTCANTYY S000395
GATABOX 1227 (+) GATA S000039
GT1CONSENSUS 1227 (+) GRWAAW S000198
IBOXCORE 1227 (+) GATAA S000199
EBOXBNNAPA 1246 (+) CANNTG S000144
CATATGGMSAUR 1246 (+) CATATG S000370
MYCCONSENSUSAT 1246 (+) CANNTG S000407
TATCCAYMOTIFOSRAMY3D 1256 (+) TATCCAY S000256
TATCCAOSAMY 1256 (+) TATCCA S000403
TATCCACHVAL21 1256 (+) TATCCAC S000416
ARR1AT 1263 (+) NGATT S000454
CACTFTPPCA1 1289 (+) YACT S000449
RAV1AAT 1305 (+) CAACA S000314
CACTFTPPCA1 1308 (+) YACT S000449
CACTFTPPCA1 1314 (+) YACT S000449
GATABOX 1328 (+) GATA S000039
IBOXCORE 1328 (+) GATAA S000199
CACTFTPPCA1 1341 (+) YACT S000449
TAAAGSTKST1 1346 (+) TAAAG S000387
DOFCOREZM 1347 (+) AAAG S000265
NODCON1GM 1347 (+) AAAGAT S000461
OSE1ROOTNODULE 1347 (+) AAAGAT S000467
NODCON2GM 1368 (+) CTCTT S000462
OSE2ROOTNODULE 1368 (+) CTCTT S000468
CAATBOX1 1379 (+) CAAT S000028
CACTFTPPCA1 1390 (+) YACT S000449
NTBBF1ARROLB 1391 (+) ACTTTA S000273
ERELEE4 1397 (+) AWTTCAAA S000037
ROOTMOTIFTAPOX1 1421 (+) ATATT S000098
NODCON2GM 1431 (+) CTCTT S000462
OSE2ROOTNODULE 1431 (+) CTCTT S000468
GATABOX 1441 (+) GATA S000039
CACTFTPPCA1 1465 (+) YACT S000449
