# Supplementary material for: Transcriptome profiling reveals histone deacetylase 1 gene overexpression improves flavonoid, isoflavonoid, and phenylpropanoid metabolism in Arachis hypogaea hairy roots
Source: PeerJ. 2021 Mar 16;9:e10976. doi: 10.7717/peerj.10976 (PMC7977374; doi:10.7717/peerj.10976)
Supplement: Supplemental Information 4 [file peerj-09-10976-s004.xls]

## Sheet: Realtime-PCR
Primer	sequence(5'-3')
Araip.B8TJ0-F	CATGGTGGTTGTGGAGGT
Araip.B8TJ0-R	GCTGGTGGTGCAGAAGAT
Araip.0P3RJ-F	TGCTTGCTTCGCTCATTC
Araip.0P3RJ-R	GCCCTGTTATCCTTACCCT
Araip.M62BY-F	AAAGGCTGGAGTAGAGCA
Araip.M62BY-R	TTCCCAAGTTTGAAGGAT
Araip.327XS-F	CTTGTGCTGGCAAAGTTGTGAGT
Araip.327XS-R	CGAGTTCTTCCTCCTTGTGGGTC
Araip.N6ZTJ-F	GTCTCACCTGCTGATGCTGCCTAT
Araip.N6ZTJ-R	CTCTTTGCTCGGGTTCCACTTTG
Aradu.5IY98-F	GACTTCTCAACATTGTATGCTCCTC
Aradu.5IY98-R	TTGGGAACATTATCTGTCCTGAA
ACT11-F	GATTGGAATGGAAGCTGCTG
ACT11-R	CGGTCAGCAATACCAGGGAA

## Sheet: ChIP-PCR
Primer	sequence(5'-3')
Araip.B8TJ0-B1-F	AAATGATACCTTACAATCGTTAG
Araip.B8TJ0-B1-R	TTAAACTACCAAATTCCTTAACC
Araip.B8TJ0-B2-F	CTCCATTCTAATGCGAAGGGTAA
Araip.B8TJ0-B2-R	TAAACGACGTTCTTTGACTGCTA
Araip.B8TJ0-TSS-F	TCGTGACATGAACATAATGGTAA
Araip.B8TJ0-TSS-R	CCTGAAGAATTGTTATGGAAAGA
Araip.0P3RJ-O1-F	GATTTATGTTTGAAGTATTTTGGCT
Araip.0P3RJ-O1-R	TAACGTGAAGAAGTAAATGCACA
Araip.0P3RJ-O2-F	ACTCACTCAACTTCTTGCGTGTA
Araip.0P3RJ-O2-R	CTGTTGGAGTAGGACGAAGGTAC
Araip.0P3RJ-TSS-F	TGGCTCTTTGCCCACCGTAGTCG
Araip.0P3RJ-TSS-R	TAGACGGCGGATGGCAGAGGTTT
Araip.M62BY-M1-F	ATTGAATGTCAGTGGCACCCTAG
Araip.M62BY-M1-R	TCAGTGACAACGCTTACACTTGA
Araip.M62BY-M2-F	TCCTTTACTTCATTCAACATACG
Araip.M62BY-M2-R	TAATAAACATCTTTTCGCACAAC
Araip.M62BY-TSS-F	TTCTATTTTAGTTTTGTCTTAGC
Araip.M62BY-TSS-R	TCTTGACAAGTAGAATTGTTATT
Araip.327XS-31-F	CATGCCTGGCCTTCTTGACCGAG
Araip.327XS-31-R	CAACCGCTGAATGTTTATCCTTA
Araip.327XS-32-F	TAGCCTGTATGCTTGGAGGTATT
Araip.327XS-32-R	CCGAGGGTCCTTCTACTAAAATC
Araip.327XS-TSS-F	TAACTGGGATAGATAGATTGAGAA
Araip.327XS-TSS-R	CTTGTGGAAATAGTGTCGATAAA
Araip.N6ZTJ-N1-F	ATCATATCCTATCCGTAGGTTGA
Araip.N6ZTJ--N1-R	AAGGTCGGGTAGTGTAGGGTTTA
Araip.N6ZTJ-N2-F	TATTATCAGCCCTACGAAAGAGT
Araip.N6ZTJ--N2-R	TTTACGAAAGGCAAGTAAATCTC
Araip.N6ZTJ-TSS-F	CTTATCCGACATAATCAAGAATC
Araip.N6ZTJ--TSS-R	GCTATTAGAACTATGGAAGGAGT
Aradu.5IY98-51-F	GAACCTCTGATTCTCATTCCATA
Aradu.5IY98-51-R	ATACAACCAGAAACCAAAATACA
Aradu.5IY98-52-F	GCCAACTGAAATGTGCAGATAAC
Aradu.5IY98-52-R	CTCCACCACTCATATTTTACTTGTTTT
Aradu.5IY98-TSS-F	CCAATGTCCACCTCACCAAAAGC
Aradu.5IY98-TSS-R	TGCCAAAATAGAAAGTGATGGAGAAAA
