# Supplementary material for: Transcriptome profiling reveals histone deacetylase 1 gene overexpression improves flavonoid, isoflavonoid, and phenylpropanoid metabolism in Arachis hypogaea hairy roots
Source: PeerJ. 2021 Mar 16;9:e10976. doi: 10.7717/peerj.10976 (PMC7977374; doi:10.7717/peerj.10976)
Supplement: Supplemental Information 5 [file peerj-09-10976-s005.xlsx]

## Sheet: Stress related DEGs
id	35S::eGFP	35S::AhHDA1	35S::AhHDA1-RNAi	Description
Araip.82RV8	1.455	24.71	1.9	senescence-associated protein
Aradu.X4R7M	5.09	47.685	3.79	jasmonate-zim-domain protein 1
Aradu.EKX2U	6.26	49.485	9.92	indole-3-acetic acid inducible 2
Araip.CQY6V	0.975	7.05	2.345	late embryogenesis abundant protein
Araip.I60BC	1.56	8.655	1.98	NAC domain protein
Araip.J9WH5	1.635	8.52	4.155	NAC domain protein
Aradu.60I66	18.325	92.805	25.875	Late embryogenesis abundant (LEA) protein-related
Aradu.0KB9D	5.2	26.22	5.455	AP2-like ethylene-responsive transcription factor AIL6-like
Araip.9634I	3.065	15.365	1.965	Stress responsive A/B Barrel Domain
Aradu.UXN6T	37.335	186.47	30.075	NAC domain protein
Aradu.L8SVN	2.195	9.955	0.995	NAC domain protein
Araip.9V1A2	17.835	74.06	14.525	Late embryogenesis abundant (LEA) protein-related
Araip.HM6LF	10.28	41.51	3.47	senescence-associated protein
Aradu.1R7R2	11.365	34.71	1.115	Stress responsive A/B Barrel Domain
Aradu.289R9	5.035	1.13	7.29	Protein phosphatase 2C family protein
Araip.JR3WW	11.095	1.835	4.98	dehydration-responsive protein RD22
