# Supplementary material for: Transcriptome profiling reveals histone deacetylase 1 gene overexpression improves flavonoid, isoflavonoid, and phenylpropanoid metabolism in Arachis hypogaea hairy roots
Source: PeerJ. 2021 Mar 16;9:e10976. doi: 10.7717/peerj.10976 (PMC7977374; doi:10.7717/peerj.10976)
Supplement: Supplemental Information 7 [file peerj-09-10976-s007.xlsx]

## Sheet: 20d
Sample	35S::AhHDA1-RNAi(cm)	35S::eGFP(cm)	35S::AhHDA1(cm)
1	1.46	1.44	2.07
2	1.54	1.5	2.13
3	1.65	1.34	2.12
4	1.69	1.33	2.1
5	1.45	1.38	2.2
6	1.33	1.39	2.41
7	1.16	1.35	2.23
8	1.98	1.29	2.41
9	1.69	1.24	2.15
10	1.82	1.33	2.06
11	0.77	1.23	2.08
12	1.15	1.42	2.24
13	1.24	1.38	2.1
14	1.17	1.46	2.15
15	0.95	1.37	2.38
16	0.96	1.41	2.29
17	1.4	1.46	2.16
18	1.87	1.44	2.47
19	1.62	1.36	1.9
20	1.63	1.45	2.45
21	1.27	1.43	2.44
22	1.08	1.32	2.07
23	1.42	1.32	2.25
24	1.7	1.35	2.13
25	1.86	1.44	2.28
26	1.61	1.48	2.2
27	1.65	1.33	2.18
28	1.7	1.37	2.14
29	0.94	1.3	2.23
30	1.15	1.3	2.2
31	1.62	1.27	2.13
32	1.33	1.24	2.09
33	1.26	1.38	2.21
34	1.48	1.31	2.14
35	0.75	1.38	2.14
36	1.23	1.37	1.96
37	1.93	1.34	2.12
38	1.68	1.43	2.06
39	1.54	1.36	2.25
40	0.97	1.41	2.23
41	1.03	1.32	2.15
42	1.47	1.38	2.16
43	1.13	1.38	2.44
44	1.42	1.43	2.27
45	1.56	1.47	2.15
46	0.98	1.42	2.26
47	1.99	1.36	2.19
48	0.68	1.4	2.47
49	0.9	1.4	2.18
50	1.51	1.33	2.14
51	0.98
AVE.	1.37941	1.3718	2.1992
STD.	0.339849	0.0635575	0.127741

## Sheet: 30d
Sample	35S::AhHDA1-RNAi(cm)	35S::eGFP(cm)	35S::AhHDA1(cm)
1	3.26	3.33	3.76
2	3.13	3.22	3.81
3	3.25	2.93	3.85
4	3.09	3.1	4.36
5	3.06	2.94	4.13
6	3.37	3.19	4.33
7	3.27	3.15	4.09
8	3.15	3.06	4.01
9	3.04	3.1	4.2
10	3.18	3.09	3.82
11	3.27	3.02	4.09
12	2.93	3.15	4.07
13	3.2	3.2	3.79
14	3.3	3.34	4.02
15	3.24	3.2	4.22
16	3.19	3.27	3.77
17	3.36	3.19	4.15
18	3.28	2.69	4.06
19	3.16	3.16	4.14
20	3.25	3.03	4.1
21	3.3	3.07	4.09
22	3.21	3.21	4.27
23	3.19	3.3	4
24	3.14	3.18	3.57
25	3.02	3.07	4.25
26	3.01	3.18	3.74
27	3.14	3.1	3.39
28	3.21	2.99	4.02
29	3.16	3.23	3.88
30	3.15	2.87	4.02
31	3.16	3.32	3.69
32	2.94	3.25	3.74
33	3.2	3.45	3.68
34	3.32	2.87	4.07
35	3.29	3.2	4.18
36	3.18	3.16	4.14
37	3.19	3.4	4.05
38	3.28	2.86	3.63
39	3.42	2.99	3.83
40	3.15	3.2	4.43
41	3.12	3.33	4.03
42	3.21	3	3.97
43	3.07	3.15	4.25
44	2.98	3.3	4
45	3.39	3.21	4.31
46	3.22	3.11	4.26
47	3.02	3.14	4.41
48	3.25	3.18	4.15
49	3.29	3.02	3.64
50	3.21	3.38	3.72
51	3.13
AVE.	3.18686	3.1416	4.0036
STD.	0.111148	0.15228	0.236994

## Sheet: 40d
Sample	35S::AhHDA1-RNAi(cm)	35S::eGFP(cm)	35S::AhHDA1(cm)
1	13.59	4.83	6.12
2	8.81	5.17	5.26
3	8.82	4.84	5.09
4	9	4.71	5.84
5	11	4.93	5.46
6	8.78	5.59	5.2
7	6.85	5.47	6.85
8	9.64	5.37	3.05
9	9	4.68	4.95
10	8.12	4.94	4.7
11	6.49	5.09	5.39
12	7.25	4.97	5.22
13	10.04	5.04	7.26
14	9.61	5.26	4.52
15	9.31	5.1	5.4
16	11.02	4.84	6.1
17	10.21	5.31	5.24
18	11.58	5.1	5.9
19	11.57	5.08	5.06
20	6.77	5.35	5.38
21	7.3	4.65	4.91
22	8.78	5.13	5.25
23	11.49	5.01	5.32
24	15.02	5.23	4.25
25	9.82	5.35	5.63
26	8.71	5.16	5.21
27	10.29	5.09	5.7
28	10.55	4.88	4.73
29	9.52	5.01	4.61
30	9.52	5.34	6.23
31	10.95	4.7	4.79
32	8.49	4.91	4.62
33	12.56	4.72	5.04
34	4.5	4.84	6.92
35	9.59	5.43	5.9
36	8.9	4.98	4.95
37	10.02	5.25	5.97
38	9.63	4.75	3.46
39	10.02	5.23	5.14
40	7.11	4.74	5.89
41	6.6	5.19	5.86
42	9.14	5.04	5.55
43	10.92	5.02	5.85
44	6.1	4.67	4.91
45	10.05	5.06	4.73
46	12.18	4.99	4.17
47	8.67	4.86	4.25
48	8.79	5.06	4.64
49	13.5	4.72	4.91
50	8.32	4.85	3.84
51	9.63
AVE.	9.49275	5.0306	5.2244
STD.	1.98892	0.233548	0.805707

## Sheet: 50d
Sample	35S::AhHDA1-RNAi(cm)	35S::eGFP(cm)	35S::AhHDA1(cm)
1	14.68	8.02	4.6
2	15.45	7.1	4.67
3	15.24	8.04	5.24
4	15.68	7.54	4.39
5	14.62	6.13	5.89
6	13.82	6.61	4.17
7	12.87	7.5	4.39
8	13.98	7.75	4.83
9	14	8.21	5.85
10	10.31	5.66	6.15
11	12.13	6.35	6.16
12	15.88	5.8	4.58
13	13.27	7.8	7.52
14	12.44	8.87	4.91
15	13.59	7.04	4.02
16	13.45	6.16	5.83
17	15.76	7.3	5.03
18	12.56	7.33	5.17
19	15.43	7.85	4.52
20	12.41	8.9	5.14
21	10.51	8.52	4.62
22	13.15	5.41	5.43
23	14.42	7.22	5.76
24	11.89	7.53	2.88
25	18.78	8.31	3.68
26	12.59	6.5	4.64
27	11.84	7.19	5.92
28	12.37	6.77	5.36
29	13.17	7.82	5.05
30	12.82	6.03	4.5
31	15.65	9.73	4.54
32	10.9	6.89	5.14
33	14.69	6.74	4.63
34	15.27	7.75	5.43
35	12.78	8.25	7.37
36	16.79	7.72	5.44
37	14.28	8.33	3.85
38	18.4	7.2	5.66
39	15.92	7.25	5.21
40	15.27	7.12	5.51
41	14.9	8.87	4.39
42	15.03	7.93	3.83
43	12.9	6.33	5.85
44	12.48	7.12	4.27
45	11.48	8.17	5.69
46	13.7	6.93	4.02
47	10.85	6.16	4.89
48	14.94	7.04	5.09
49	12.73	8.32	5.78
50	16.47	7.78	5.88
51	15.35
AVE.	13.9194	7.3778	5.0674
STD.	1.86812	0.922077	0.868632

## Sheet: 60d
Sample	35S::AhHDA1-RNAi(cm)	35S::eGFP(cm)	35S::AhHDA1(cm)
1	20.33	9.83	5.4
2	17.66	13.51	5.38
3	16.55	10.64	5.34
4	17.99	9.43	5.54
5	13.4	7.3	4.73
6	13.18	10.07	4.97
7	14.88	11.27	4.52
8	15.35	11.29	4.69
9	16.44	12.76	6.14
10	16.19	8.99	4.63
11	18.35	8.49	5.58
12	15.45	10.59	6.69
13	13.94	11.33	4.39
14	20.61	8.74	5.91
15	16.66	9.9	4.08
16	15.85	12.23	4.29
17	17.65	10.5	4.73
18	20.27	10.23	5.63
19	15.72	10.54	4.53
20	15.89	12.99	5.44
21	12.93	11.53	4.59
22	12.7	7.95	4.66
23	15.86	11.43	5.62
24	13.51	12.27	5.93
25	14.11	10.08	6.77
26	14.13	11.47	6.21
27	13.61	8.98	6.2
28	16.92	10.67	6.22
29	18.78	9.12	5.6
30	13.31	10.61	3.84
31	14.46	6.93	5.63
32	14.69	12.44	4.3
33	12.78	11.98	4.82
34	17.74	10.24	5.63
35	12.08	11.95	4.95
36	15.85	10.72	5.34
37	14.11	8.32	5.49
38	20.23	11.82	4.68
39	16.69	9.44	6.88
40	18.97	10.74	6.31
41	13.05	11.56	5.35
42	14.66	11.24	5.43
43	15.21	10.59	3.8
44	16.54	11	5.12
45	16.71	9.68	4.96
46	9.99	9.57	6.2
47	19.44	9.31	5.12
48	18.55	9.36	4.91
49	17.75	9.93	3.74
50	17.8	12.02	5.49
51	11.71
AVE.	15.828	10.4716	5.248
STD.	2.46392	1.43904	0.768587
