# Supplementary material for: Transcriptome profiling reveals histone deacetylase 1 gene overexpression improves flavonoid, isoflavonoid, and phenylpropanoid metabolism in Arachis hypogaea hairy roots
Source: PeerJ. 2021 Mar 16;9:e10976. doi: 10.7717/peerj.10976 (PMC7977374; doi:10.7717/peerj.10976)
Supplement: Supplemental Information 8 [file peerj-09-10976-s008.xlsx]

## Sheet: MR
Sample	35S::eGFP(10-2 mm2)	35S::AhHDA1(10-2 mm2)	35S::AhHDA1-RNAi(10-2 mm2)
1	0.2001	0.2033	0.1569
2	0.147	0.2063	0.1189
3	0.1703	0.1804	0.1753
4	0.17	0.2257	0.1531
5	0.1868	0.1694	0.1073
6	0.2137	0.1678	0.1653
7	0.1777	0.189	0.1291
8	0.1701	0.1882	0.226
9	0.1941	0.1892	0.2589
10	0.1758	0.1926	0.1907
11	0.163	0.1684	0.1889
12	0.1746	0.1397	0.228
13	0.1895	0.1862	0.1439
14	0.1567	0.1616	0.1592
15	0.1442	0.1653	0.2432
16	0.1943	0.2	0.1683
17	0.198	0.1863	0.2865
18	0.1633	0.2007	0.1429
19	0.14	0.2168	0.1931
20	0.2567	0.1782	0.1539
21	0.131	0.1827	0.136
22	0.129	0.2252	0.2751
23	0.1565	0.189	0.1626
24	0.1388	0.2017	0.1107
25	0.2007	0.1439	0.1843
26	0.2268	0.2122	0.1882
27	0.1696	0.1918	0.1811
28	0.2173	0.1811	0.1278
29	0.1779	0.2192	0.1978
30	0.1634	0.1858	0.1762
31	0.2154	0.2038	0.1831
32	0.1176	0.168	0.191
33	0.1279	0.1794	0.1278
34	0.1738	0.1666	0.219
35	0.1541	0.1801	0.2254
36	0.2002	0.1906	0.2306
37	0.2101	0.1577	0.0891
38	0.1499	0.1802	0.2281
39	0.2077	0.2037	0.1609
40	0.2129	0.1807	0.143
41	0.2296	0.2315	0.1184
42	0.161	0.2191	0.1363
43	0.1743	0.1939	0.2242
44	0.2109	0.203	0.2004
45	0.2516	0.1887	0.2234
46	0.1919	0.1915	0.2602
47	0.1724	0.2256	0.1387
48	0.1371	0.1835	0.2056
49	0.1982	0.2203	0.179
50	0.1675	0.2008	0.2153
AVE.	0.17922	0.190328	0.180574
STD.	0.0317625	0.0207978	0.0460479

## Sheet: NER
Sample	35S::eGFP(10-2 mm2)	35S::AhHDA1(10-2 mm2)	35S::AhHDA1-RNAi(10-2 mm2)
1	0.2459	0.1222	0.5756
2	0.2154	0.1201	-0.011
3	0.1801	0.1314	0.3803
4	0.2636	0.0952	0.1847
5	0.1518	0.2752	0.2403
6	0.2389	0.2242	0.2137
7	0.1791	0.1872	0.2557
8	0.1602	0.0768	0.6426
9	0.2543	0.1478	0.2961
10	0.4273	0.2032	0.3189
11	0.0657	0.3125	0.3983
12	0.1522	0.175	0.3601
13	0.225	0.1871	0.1272
14	0.2516	0.1768	0.4916
15	0.228	0.3108	0.4187
16	0.1685	0.0986	0.2925
17	0.1775	0.2368	0.308
18	0.3373	0.1579	0.1585
19	0.284	0.0644	0.1841
20	0.2291	0.2397	0.4574
21	0.2587	0.304	0.2282
22	0.1989	0.2143	0.4469
23	0.2012	0.1296	0.0818
24	0.3881	0.1048	0.1621
25	0.0746	0.1272	0.188
26	0.1652	0.1897	0.423
27	0.2701	0.1757	-0.0499
28	0.2401	0.2579	0.551
29	0.2604	0.1874	0.3286
30	0.2644	0.2049	0.1227
31	0.1756	0.3484	0.6496
32	0.2043	0.1768	0.4211
33	0.2283	0.2447	0.3655
34	0.0539	0.2665	0.3669
35	0.2106	0.2433	0.4031
36	0.3295	0.1527	0.2246
37	0.3189	0.1975	0.6167
38	0.3458	0.1744	0.4311
39	0.2673	0.0431	0.441
40	0.2081	0.0483	0.2687
41	0.1957	0.0527	0.404
42	0.2958	0.1518	0.1557
43	0.1055	0.1476	0.5322
44	0.3287	0.2095	0.1148
45	0.3375	0.0173	0.1385
46	0.1133	0.319	0.2203
47	0.2839	0.1962	0.3812
48	0.0882	0.1877	0.3211
49	0.199	0.2753	0.536
50	0.1509	0.3008	0.0447
AVE.	0.22396	0.18384	0.31625
STD.	0.0813128	0.0789434	0.167908

## Sheet: FER
Sample	35S::eGFP(10-2 mm2)	35S::AhHDA1(10-2 mm2)	35S::AhHDA1-RNAi(10-2 mm2)
1	0.6039	0.448	0.777
2	0.7518	0.4454	0.7527
3	0.6145	0.4571	1.0457
4	0.8935	0.4571	0.8607
5	0.9584	0.4343	0.6943
6	0.6291	0.4464	0.6259
7	0.843	0.4578	0.9445
8	0.633	0.4377	0.8111
9	0.6754	0.4463	0.901
10	0.6772	0.4662	0.7143
11	1.1867	0.4617	0.903
12	0.7911	0.4526	1.1812
13	0.3849	0.4639	0.5583
14	0.7867	0.466	1.0593
15	0.5767	0.4622	0.6305
16	1.0449	0.4322	0.8842
17	0.697	0.4647	1.189
18	0.8449	0.4572	1.1449
19	1.0493	0.4535	0.8984
20	0.5148	0.4339	0.9118
21	0.7688	0.4309	0.5261
22	0.454	0.4423	0.5856
23	0.8291	0.4216	0.3665
24	0.4656	0.4479	0.8017
25	0.664	0.4576	0.8529
26	1.021	0.4365	0.4094
27	1.0577	0.4504	0.9322
28	1.0254	0.4441	0.705
29	0.6032	0.4416	0.7276
30	0.5341	0.4576	1.0071
31	0.8226	0.4398	0.8823
32	0.3724	0.4562	0.6928
33	0.5512	0.4479	0.838
34	0.8906	0.4488	0.8121
35	0.839	0.4527	0.7519
36	0.2794	0.4454	1.0182
37	0.7725	0.4484	0.7377
38	0.7486	0.4504	0.7504
39	0.9913	0.4454	0.7928
40	0.6449	0.4485	0.9446
41	0.9493	0.4633	0.7806
42	0.7882	0.4524	1.0147
43	0.7659	0.4565	0.7462
44	0.776	0.4528	0.8345
45	0.4799	0.4482	0.7382
46	0.4426	0.4544	1.0286
47	0.6166	0.4424	0.8444
48	0.6978	0.4548	0.7562
49	0.7322	0.4763	0.8942
50	0.8982	0.4519	1.2878
AVE.	0.732778	0.450224	0.830962
STD.	0.201564	0.0104411	0.186379

## Sheet: RHR
Sample	35S::eGFP(10-2 mm2)	35S::AhHDA1(10-2 mm2)	35S::AhHDA1-RNAi(10-2 mm2)
1	1.0582	0.2813	1.2469
2	0.3534	0.2861	1.4157
3	0.8019	0.2572	1.0426
4	0.7812	0.257	1.1093
5	0.9179	0.2397	1.4526
6	0.8218	0.2983	1.0016
7	1.1013	0.2588	1.1016
8	0.8487	0.2508	1.145
9	0.8149	0.2794	1.0878
10	1.1021	0.2374	1.1562
11	0.3547	0.2822	1.0683
12	0.8037	0.2749	1.183
13	0.1828	0.2452	0.9356
14	1.0248	0.3118	1.158
15	0.5053	0.2689	1.2227
16	0.7531	0.2656	1.2555
17	0.5436	0.2512	1.3256
18	0.7287	0.2781	0.9872
19	1.0331	0.2795	1.1367
20	1.1241	0.2673	1.1633
21	0.667	0.2894	0.9385
22	0.6387	0.2604	1.2801
23	0.4592	0.2991	0.8056
24	0.667	0.2918	0.7772
25	0.9486	0.2698	1.5212
26	0.3988	0.3029	1.1798
27	0.5659	0.2785	1.1981
28	0.8861	0.3194	1.0468
29	0.5927	0.2663	1.2159
30	0.8358	0.2903	0.884
31	0.5774	0.259	0.9965
32	0.9508	0.3191	1.3083
33	0.6737	0.2989	1.3596
34	0.684	0.2709	0.781
35	-0.0157	0.2447	1.1022
36	0.6097	0.2711	1.3521
37	0.7898	0.3306	1.3151
38	0.5502	0.3026	1.159
39	0.7818	0.2914	1.3047
40	0.5725	0.2944	1.3834
41	0.536	0.2648	1.2139
42	0.8215	0.2848	1.1802
43	0.8279	0.2837	0.9493
44	0.2328	0.2742	1.1563
45	0.9207	0.2856	0.8689
46	0.6658	0.2424	1.0644
47	0.5508	0.2877	1.0813
48	0.7383	0.2446	0.9307
49	0.8433	0.2907	1.207
50	0.6725	0.2494	1.0027
AVE.	0.705978	0.276584	1.13518
STD.	0.241876	0.0220693	0.17279
