# Supplementary material for: Transcriptome profiling reveals histone deacetylase 1 gene overexpression improves flavonoid, isoflavonoid, and phenylpropanoid metabolism in Arachis hypogaea hairy roots
Source: PeerJ. 2021 Mar 16;9:e10976. doi: 10.7717/peerj.10976 (PMC7977374; doi:10.7717/peerj.10976)
Supplement: Supplemental Information 9 [file peerj-09-10976-s009.xlsx]

## Sheet: MR
Sample	35S::eGFP(10-2 mm2)	35S::AhHDA1(10-2 mm2)	35S::AhHDA1-RNAi(10-2 mm2)
1	0.4054	0.2257	0.331
2	0.3541	0.3494	0.3014
3	0.511	0.299	0.2717
4	0.4604	0.3502	0.3503
5	0.3797	0.1109	0.2985
6	0.299	0.3911	0.3858
7	0.3711	0.1803	0.3091
8	0.3837	0.3319	0.2946
9	0.2919	0.089	0.308
10	0.398	0.1719	0.4101
11	0.4176	0.1379	0.3466
12	0.3667	0.3614	0.3916
13	0.428	0.1416	0.3256
14	0.2945	0.3294	0.2886
15	0.4886	0.163	0.3534
16	0.4292	0.1575	0.3738
17	0.3201	0.4408	0.3107
18	0.4328	0.1787	0.3458
19	0.5474	0.2467	0.3485
20	0.5353	0.2351	0.3806
21	0.3582	0.473	0.3233
22	0.466	0.2711	0.37
23	0.4171	0.3122	0.3106
24	0.4351	0.2679	0.3621
25	0.3831	0.1395	0.3136
26	0.2844	0.4157	0.385
27	0.4236	0.3501	0.312
28	0.3749	0.3977	0.2179
29	0.4356	0.4312	0.329
30	0.3478	0.2234	0.3538
31	0.4144	0.2548	0.2957
32	0.3114	0.2684	0.289
33	0.4604	0.4924	0.3252
34	0.3516	0.1234	0.2236
35	0.3734	0.4274	0.3181
36	0.4197	0.3103	0.3347
37	0.3679	0.2285	0.2544
38	0.4039	0.4085	0.3079
39	0.3607	0.3275	0.2634
40	0.4915	0.2019	0.343
41	0.4047	0.0275	0.3134
42	0.5265	0.5221	0.3053
43	0.5427	0.2611	0.2646
44	0.3554	0.1848	0.325
45	0.3027	0.0644	0.3674
46	0.2598	0.2419	0.292
47	0.5193	0.5069	0.3363
48	0.3846	0.2971	0.305
49	0.3093	0.2996	0.3081
50	0.2149	0.369	0.2995
AVE.	0.396302	0.279816	0.321492
STD.	0.0765817	0.120629	0.040553

## Sheet: NER
Sample	35S::eGFP(10-2 mm2)	35S::AhHDA1(10-2 mm2)	35S::AhHDA1-RNAi(10-2 mm2)
1	0.3343	0.2018	0.2846
2	0.3497	0.3401	0.3801
3	0.1803	0.2905	0.2376
4	0.2704	0.2611	0.2144
5	0.1945	0.34	0.2884
6	0.239	0.3124	0.2155
7	0.3451	0.1963	0.2164
8	0.267	0.3098	0.2783
9	0.2405	0.2574	0.2606
10	0.2139	0.3489	0.2259
11	0.3948	0.2741	0.3255
12	0.3235	0.1851	0.281
13	0.3333	0.2264	0.2084
14	0.3467	0.3087	0.2322
15	0.3204	0.2129	0.3087
16	0.2787	0.3304	0.2677
17	0.1597	0.3525	0.237
18	0.3594	0.2378	0.2053
19	0.3644	0.2508	0.226
20	0.2494	0.2856	0.2946
21	0.4033	0.4442	0.2623
22	0.2556	0.2978	0.2506
23	0.2859	0.2191	0.3388
24	0.3149	0.3331	0.205
25	0.1881	0.3417	0.2738
26	0.2793	0.3351	0.3016
27	0.2464	0.2776	0.3045
28	0.3225	0.3262	0.3119
29	0.2322	0.1608	0.2481
30	0.3179	0.3385	0.2714
31	0.3648	0.2568	0.3234
32	0.3077	0.3026	0.229
33	0.3673	0.2567	0.2698
34	0.2946	0.4015	0.3352
35	0.3423	0.222	0.3026
36	0.2171	0.2324	0.1843
37	0.2459	0.2668	0.2922
38	0.259	0.341	0.2734
39	0.2793	0.3632	0.3326
40	0.3553	0.3796	0.2515
41	0.2253	0.2756	0.2865
42	0.2446	0.3076	0.2325
43	0.2214	0.3442	0.2469
44	0.3075	0.3487	0.3163
45	0.2862	0.3245	0.2687
46	0.2893	0.2791	0.2758
47	0.2307	0.2156	0.3111
48	0.3163	0.3173	0.285
49	0.3498	0.2405	0.3084
50	0.2187	0.3528	0.2762
AVE.	0.286684	0.292504	0.271152
STD.	0.0592057	0.0597656	0.0419053

## Sheet: FER
Sample	35S::eGFP(10-2 mm2)	35S::AhHDA1(10-2 mm2)	35S::AhHDA1-RNAi(10-2 mm2)
1	0.35	0.1677	0.1242
2	0.1489	0.3687	0.1343
3	0.2888	0.1133	0.1216
4	0.5252	0.2121	0.0904
5	0.3007	0.1891	0.1241
6	0.2624	0.3539	0.1123
7	0.404	0.1552	0.0966
8	0.2665	0.2561	0.1021
9	0.3952	0.3124	0.1505
10	0.2907	0.1282	0.0988
11	0.313	0.1958	0.1017
12	0.2857	0.205	0.1186
13	0.2402	0.2488	0.0985
14	0.3772	0.1645	0.1386
15	0.3127	0.2204	0.1419
16	0.4281	0.1732	0.1226
17	0.3656	0.1479	0.0978
18	0.2682	0.2568	0.1256
19	0.4057	0.1507	0.0533
20	0.3099	0.2375	0.0722
21	0.3577	0.1042	0.0838
22	0.3957	0.2426	0.1504
23	0.2452	0.3291	0.1233
24	0.32	0.2323	0.1241
25	0.2774	0.2238	0.0795
26	0.3814	0.066	0.0746
27	0.3119	0.1162	0.1375
28	0.3276	0.1579	0.118
29	0.2115	0.2149	0.0529
30	0.2809	0.2809	0.0961
31	0.3569	0.2212	0.0894
32	0.4414	0.2256	0.127
33	0.3132	0.1457	0.0994
34	0.3438	0.1845	0.0585
35	0.248	0.071	0.0576
36	0.1802	0.2679	0.1943
37	0.4153	0.2129	0.1047
38	0.2064	0.1999	0.1017
39	0.3369	0.2066	0.0995
40	0.2687	0.1944	0.0946
41	0.3112	0.2834	0.1169
42	0.382	0.1889	0.1018
43	0.2282	0.1727	0.1327
44	0.2977	0.17	0.1073
45	0.2844	0.1691	0.119
46	0.4164	0.3269	0.1105
47	0.3164	0.1599	0.113
48	0.3627	0.3115	0.0871
49	0.2883	0.3403	0.0912
50	0.2491	0.2682	0.0572
AVE.	0.317904	0.210916	0.106586
STD.	0.0724704	0.0707515	0.027688

## Sheet: RHR
Sample	35S::eGFP(10-2 mm2)	35S::AhHDA1(10-2 mm2)	35S::AhHDA1-RNAi(10-2 mm2)
1	0.3356	0.2261	0.1683
2	0.3085	0.2358	0.1178
3	0.3203	0.1999	0.115
4	0.3173	0.2019	0.1309
5	0.3364	0.2286	0.163
6	0.3383	0.2313	0.1147
7	0.3221	0.2296	0.1079
8	0.3393	0.2612	0.1374
9	0.3239	0.2307	0.0959
10	0.3153	0.2679	0.126
11	0.328	0.1974	0.1034
12	0.3176	0.2221	0.1316
13	0.3185	0.2393	0.1054
14	0.3247	0.2588	0.1231
15	0.3107	0.2462	0.1243
16	0.3341	0.2305	0.1321
17	0.3357	0.2006	0.1265
18	0.3188	0.2284	0.1195
19	0.3292	0.2402	0.1279
20	0.3317	0.202	0.1723
21	0.3095	0.2189	0.127
22	0.3266	0.1994	0.1345
23	0.3224	0.2636	0.1497
24	0.3262	0.2283	0.1476
25	0.3261	0.1953	0.1056
26	0.34	0.2459	0.1206
27	0.3236	0.2469	0.1622
28	0.3377	0.2459	0.1235
29	0.3388	0.2175	0.1252
30	0.3389	0.2435	0.1241
31	0.3116	0.2482	0.1114
32	0.335	0.2383	0.1401
33	0.3283	0.2313	0.1168
34	0.3347	0.2339	0.1027
35	0.3205	0.2401	0.1513
36	0.319	0.2446	0.153
37	0.3127	0.2398	0.1156
38	0.3444	0.2273	0.1022
39	0.3241	0.2057	0.1539
40	0.3241	0.2232	0.153
41	0.3359	0.2395	0.1467
42	0.3091	0.2379	0.123
43	0.3135	0.2239	0.1059
44	0.3454	0.2049	0.1238
45	0.3395	0.2364	0.1438
46	0.3309	0.2103	0.1322
47	0.3402	0.2337	0.133
48	0.3289	0.2788	0.1347
49	0.322	0.2608	0.1268
50	0.3335	0.2145	0.1604
AVE.	0.326982	0.231136	0.129866
STD.	0.0100816	0.0196828	0.0187834
