# Supplementary material for: Transcriptome profiling reveals histone deacetylase 1 gene overexpression improves flavonoid, isoflavonoid, and phenylpropanoid metabolism in Arachis hypogaea hairy roots
Source: PeerJ. 2021 Mar 16;9:e10976. doi: 10.7717/peerj.10976 (PMC7977374; doi:10.7717/peerj.10976)
Supplement: Supplemental Information 10 [file peerj-09-10976-s010.xlsx]

## Sheet: FI
Seq	Sa	Sa	Sa	H2O2	H2O2	H2O2
1	1.0031	4.1623	0.612603	0.950845	2.68184	0.729847
2	0.843116	4.01953	0.687727	0.939867	2.23612	0.861892
3	1.10072	4.04553	0.705842	1.00188	2.60432	0.582791
4	1.00076	4.11586	0.65065	1.07913	2.47559	0.662066
5	0.968344	4.50253	0.660966	1.03009	2.84123	0.523241
6	1.04171	3.93969	0.598662	1.00207	2.83874	0.73978
AVE.	0.992961	4.13091	0.652742	1.00065	2.61297	0.683269
STE.	0.0862702	0.197773	0.0415967	0.0513878	0.231854	0.121181
